# Supplementary material for: A high-breakdown-voltage β-Ga2O3 nanoFET with a beveled field-plate structure
Source: Royal Society of Chemistry journal article supplement (doi:10.1039/d4tc00106k), 2024-01-01
Supplement: d4tc00106k1.pdf [file d4tc00106k1.pdf]

Supplementary Information for

**High-breakdown-voltage  $\beta$ -Ga<sub>2</sub>O<sub>3</sub> nanoFET with a beveled field-plate structure**

Jeongmin Kim<sup>a</sup>, Hyeongwoo Kim<sup>b</sup>, Inho Kang<sup>b</sup>, Junghun Kim<sup>b</sup>, Seokjin Ko<sup>a</sup>, Jinho Bae<sup>\*c</sup>,  
Jihyun Kim<sup>\*a</sup>

<sup>a</sup> School of Chemical and Biological Engineering, Seoul National University, Seoul 08826,  
Republic of Korea

<sup>b</sup> Korea Electrotechnology Research Institute (KERI), Seongsan-gu, Changwon-si,  
Gyeongsangnam-do 51543, Republic of Korea

<sup>c</sup> Department of Chemical and Biological Engineering, Korea University, Seoul 02841,  
Republic of Korea

\*Email: Jinho Bae ([bruce352002@gmail.com](mailto:bruce352002@gmail.com)), Jihyun Kim ([jihyunkim@snu.ac.kr](mailto:jihyunkim@snu.ac.kr))

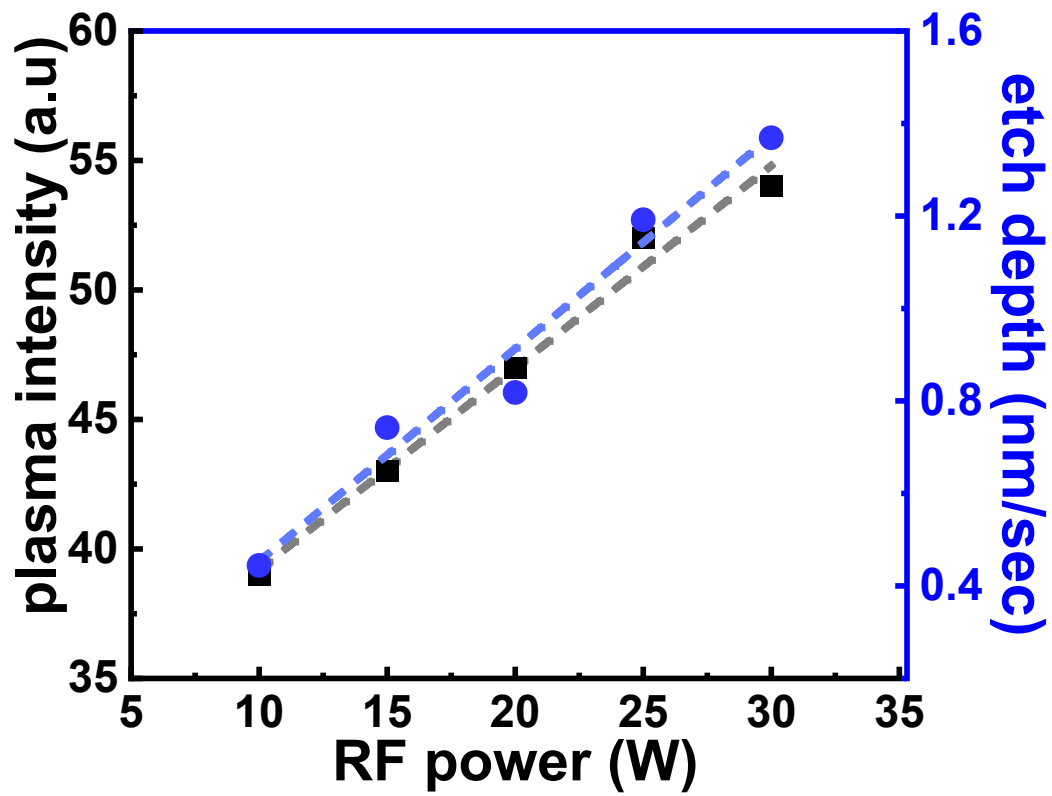

**Fig. S1.** Relationship between RF power and plasma intensity, and RF power and etch depth for h-BN etching.

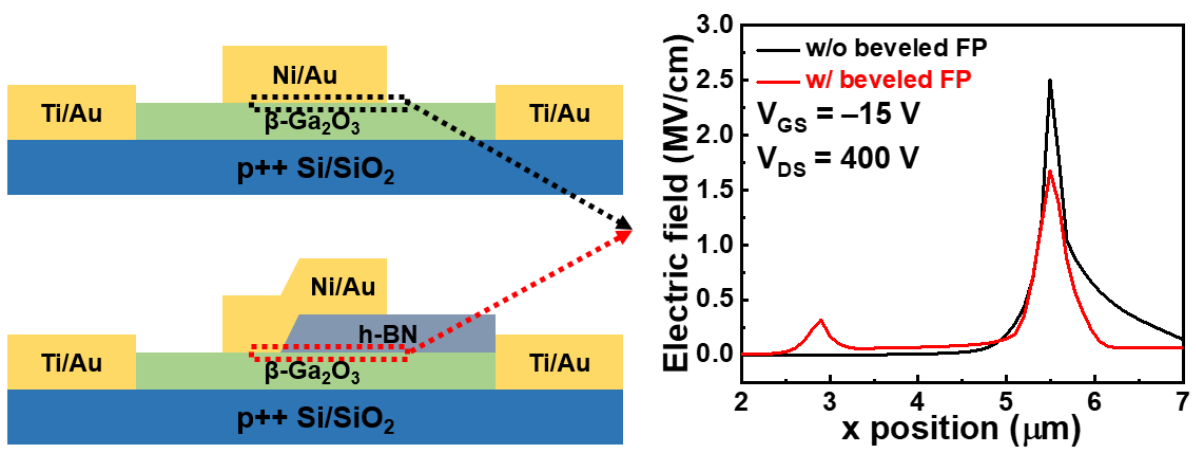

**Fig. S2.** The simulation of electric fields distribution on the surface of the  $\beta\text{-Ga}_2\text{O}_3$  channel at  $V_{\text{GS}} = -15 \text{ V}$ ,  $V_{\text{DS}} = 400 \text{ V}$ .

The beveled h-BN field-plate redistributes the electric fields on the surface of the  $\beta\text{-Ga}_2\text{O}_3$ . Fig. S2 presents the electric-field distributions calculated around the gate edge with and without the beveled field plate.
